# Supplementary material for: Macranthoidin B restrains the epithelial-mesenchymal transition through COX-2/PGE2 pathway in endometriosis
Source: Frontiers journal article supplement (doi:10.3389/fphar.2024.1492098), 2024-12-12
Supplement: Data_Sheet_1.pdf [file Data_Sheet_1.pdf]

Figure S1

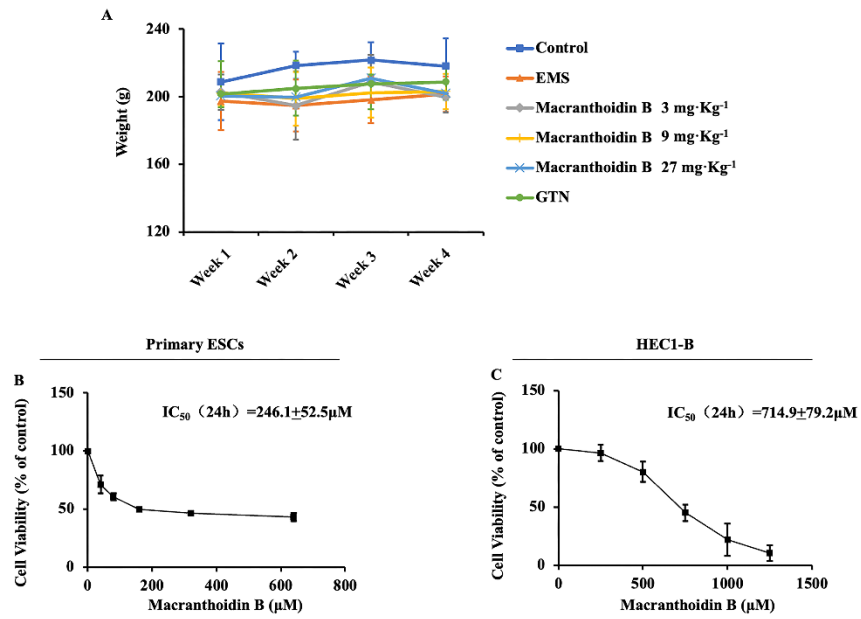

**Figure S1.** The effect of macranthoidin B on rat body weight and human endometrial cells. (A) Body weight was measured during the experimental period. (B-C) In primary ESCs and HEC1-B cells, 24h  $IC_{50}$  value of macranthoidin B were evaluated by MTT assay.
